# Supplementary material
Source: ML conference proceedings conference paper supplement (https://openreview.net/forum?id=xzEtNSuDJk)
Supplement: supplementary_material [file attachment]

## 555 A Metrics Visualization

We provide a visualization of the three metrics we compute in Figure 4. For completeness, we also

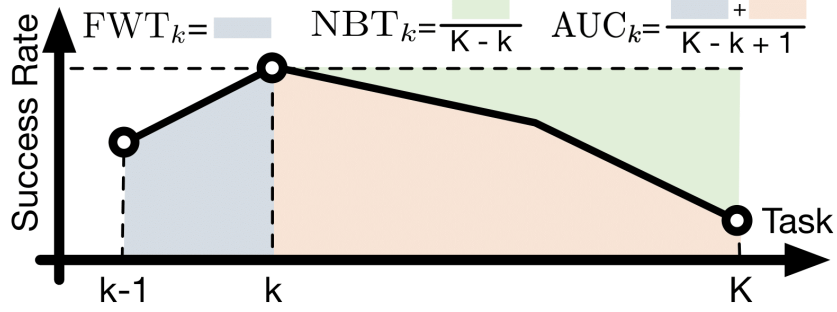

Figure 4: Metrics for LLDM

556 provide the formulas for the metrics here:  
557

$$\begin{aligned} \text{FWT} &= \sum_{k \in [K]} \frac{\text{FWT}_k}{K}, \quad \text{FWT}_k = \frac{1}{11} \sum_{e \in \{0 \dots 50\}} c_{k,k,e} \\ \text{NBT} &= \sum_{k \in [K]} \frac{\text{NBT}_k}{K}, \quad \text{NBT}_k = \frac{1}{K-k} \sum_{\tau=k+1}^K (c_{k,k} - c_{\tau,k}) \\ \text{AUC} &= \sum_{k \in [K]} \frac{\text{AUC}_k}{K}, \quad \text{AUC}_k = \frac{1}{K-k+1} (\text{FWT}_k + \sum_{\tau=k+1}^K c_{\tau,k}). \end{aligned}$$

## 558 B Implemented Neural Architectures and Lifelong Learning Algorithms

|                         |              |
|-------------------------|--------------|
| Neural Policy Arch.     | RESNET-RNN   |
|                         | RESNET-T     |
|                         | VIT-T        |
| Lifelong Learning Algo. | SEQL         |
|                         | EWC [33]     |
|                         | ER [13]      |
|                         | PACKNET [40] |
|                         | MTL          |

Table 4: The implemented neural policy architectures and the lifelong learning algorithms in LIBERO.

### 559 B.1 Neural Architectures

560 In Section 4.4, we outlined the neural network architectures utilized in our experiments, namely  
561 RESNET-RNN, RESNET-T, and VIT-T. The specifics of each architecture are illustrated in Figure 5  
562 Furthermore, Table 5, 6, and 7 display the hyperparameters for the architectures used throughout all  
563 of our experiments.

## 564 C Computation

565 For all experiments, we use a single Nvidia A100 GPU or a single Nvidia A40 GPU (CUDA 11.7)  
566 with 8 16 CPUs for training and evaluation.

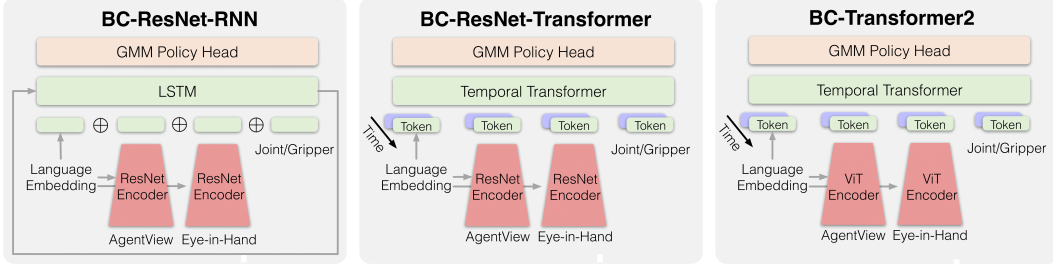

Figure 5: We provide visualizations of the architectures for RESNET-RNN, RESNET-T, and ViT-T, respectively. It is worth noting that each model architecture incorporates language embedding in distinct ways.

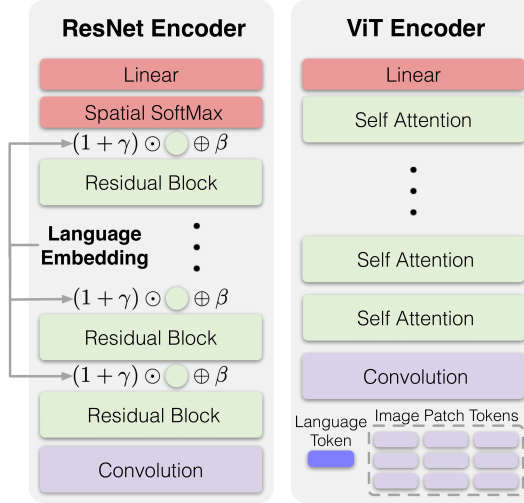

Figure 6: The image encoders: ResNet-based encoder and the vision transformer-based encoder.

| Variable                | Value |
|-------------------------|-------|
| resnet_image_embed_size | 64    |
| text_embed_size         | 32    |
| rnn_hidden_size         | 1024  |
| rnn_layer_num           | 2     |
| rnn_dropout             | 0.0   |

Table 5: Hyper parameters of RESNET-RNN.

| Variable                     | Value |
|------------------------------|-------|
| extra_info_hidden_size       | 128   |
| img_embed_size               | 64    |
| transformer_num_layers       | 4     |
| transformer_num_heads        | 6     |
| transformer_head_output_size | 64    |
| transformer_mlp_hidden_size  | 256   |
| transformer_dropout          | 0.1   |
| transformer_max_seq_len      | 10    |

Table 6: Hyper parameters of RESNET-T.

## 568 C.1 Lifelong Learning Algorithms

569 Lifelong learning (LL) is a field of study that aims to understand how an agent can continually  
 570 acquire and retain knowledge over an infinite sequence of tasks without catastrophically forgetting  
 571 previous knowledge. Recent literature proposes three main approaches to address the problem of  
 572 catastrophic forgetting in deep learning: Dynamic Architecture approaches, Regularization-Based  
 573 approaches, and Rehearsal approaches. Although some recent works explore the combination of  
 574 different approaches [2, 29, 53] or new strategies [72, 56, 14], our benchmark aims to provide an  
 575 in-depth analysis of these three basic lifelong learning directions to reveal their pros and cons on  
 576 robot learning tasks.



| Variable                              | Value |
|---------------------------------------|-------|
| extra_info_hidden_size                | 128   |
| img_embed_size                        | 128   |
| spatial_transformer_num_layers        | 7     |
| spatial_transformer_num_heads         | 8     |
| spatial_transformer_head_output_size  | 120   |
| spatial_transformer_mlp_hidden_size   | 256   |
| spatial_transformer_dropout           | 0.1   |
| spatial_down_sample_embed_size        | 64    |
| temporal_transformer_input_size       | null  |
| temporal_transformer_num_layers       | 4     |
| temporal_transformer_num_heads        | 6     |
| temporal_transformer_head_output_size | 64    |
| temporal_transformer_mlp_hidden_size  | 256   |
| temporal_transformer_dropout          | 0.1   |
| temporal_transformer_max_seq_len      | 10    |

Table 7: Hyper parameters of ViT-T.

The dynamic architecture approach gradually expands the learning model to incorporate new knowledge [55, 70, 40, 26, 69, 5]. Regularization-based methods, on the other hand, regularize the learner to a previous checkpoint when it learns a new task [33, 11, 59, 36]. Rehearsal methods save exemplar data from prior tasks and replay them with new data to consolidate the agent’s memory [13, 38, 12, 9]. For a comprehensive review of LL methods, we refer readers to surveys [16, 48].

The following paragraphs provide details on the three lifelong learning algorithms that we have implemented.

**ER** Experience Replay (ER) [13] is a **rehearsal-based** approach that maintains a memory buffer of samples from previous tasks and leverages it to learn new tasks. After the completion of policy learning for a task, ER stores a portion of the data into a storage memory. When training a new task, ER samples data from the memory and combines it with the training data from the current task so that the training data approximately represents the empirical distribution of all-task data. In our implementation, we use a replay buffer to store a portion of the training data (up to 1000 trajectories) after training each task. For every training iteration during the training of a new task, we uniformly sample a fixed number of replay data from the memory (32 trajectories) along with each batch of training data from the new task.

**EWC** Elastic Weight Consolidation(EWC) [33] is a **regularization-based** approach that add a regularization term that constraints neural network update to the original single-task learning objective. Specifically, EWC uses the Fisher information matrix that quantify the importance of every neural netwrk parameter. The loss function for task  $k$  is:

$$\mathcal{L}_k^{EWC}(\theta) = \mathcal{L}_K^{BC}(\theta) + \sum_i \frac{\lambda}{2} F_i (\theta_i - \theta_{k-1,i}^*)^2,$$

where  $\lambda$  is a penalty hyperparameter, and the coefficient  $F_i$  is the diagonal of the Fisher information matrix:  $F_k = \mathbb{E}_{s \sim \mathcal{D}_k} \mathbb{E}_{a \sim p_{\theta}(\cdot|s)} (\nabla_{\theta_k} \log p_{\theta_k}(a|s))^2$ . In this work, we use the online update version of EWC that updates the Fisher information matrix using exponential moving average along the lifelong learning process, and use the empirical estimation of above Fisher information matrix to stabilize the estimation. Formally, the actually used estimation of Fisher Information Matrix is  $\tilde{F}_k = \gamma F_{k-1} + (1 - \gamma) F_k$ , where  $F_k = \mathbb{E}_{(s,a) \sim \mathcal{D}_k} (\nabla_{\theta_k} \log p_{\theta_k}(a|s))^2$  and  $k$  is the task number. We set  $\gamma = 0.9$  and  $\lambda = 5 \cdot 10^4$ .

**PACKNET** PACKNET [40] is a **dynamic architecture-based** approach that aims to prevent changes to parameters that are important for previous tasks in lifelong learning. To achieve this, PACKNET

602 iteratively trains, prunes, fine-tunes, and freezes parts of the network. The method theoretically  
603 completely avoids catastrophic forgetting, but for each new task, the number of available parameters  
604 shrinks. The pruning process in PACKNET involves two stages. First, the network is trained, and at the  
605 end of the training, a fixed proportion of the most important parameters (25% in our implementation)  
606 are chosen, and the rest are pruned. Second, the selected part of the network is fine-tuned and then  
607 frozen. In our implementation, we follow the original paper [40] and do not train all biases and  
608 normalization layers. We perform the same number of fine-tuning epochs as for training (50 epochs  
609 in our implementation). Note that all evaluation metrics are calculated *before* the fine-tuning stage.

## 610 D LIBERO Task Suite Designs

### 611 D.1 Task Suites

612 We visualize all the tasks from the four task suites in Figure 7-10. Figure 7 visualizes the initial  
613 states since the task goals are always the same. All the figures visualize the goal states of tasks except  
614 for Figure 7 which visualizes the initial states since the task goals are always the same.

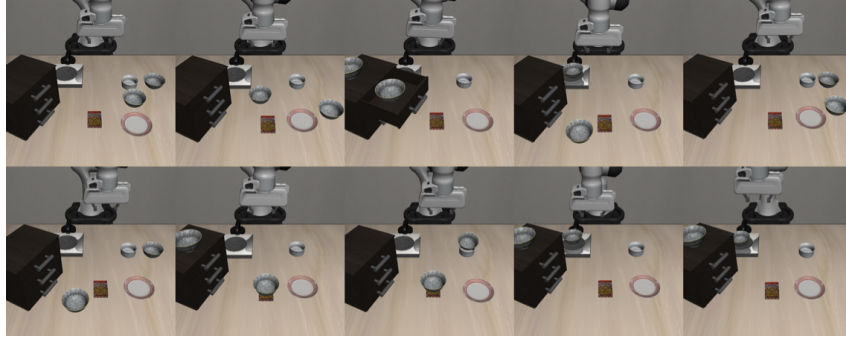

Figure 7: LIBERO-SPATIAL

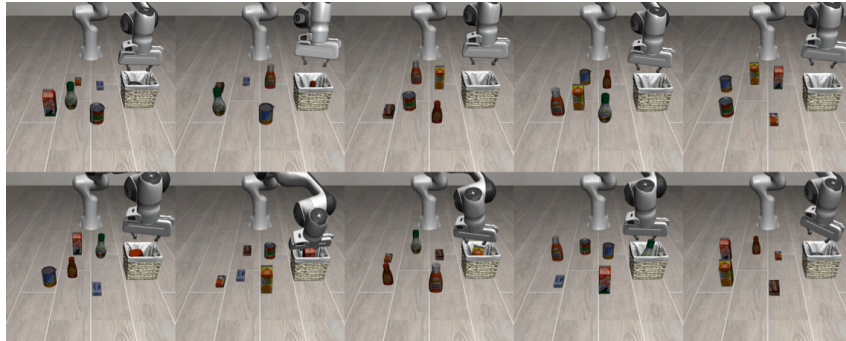

Figure 8: LIBERO-OBJECT

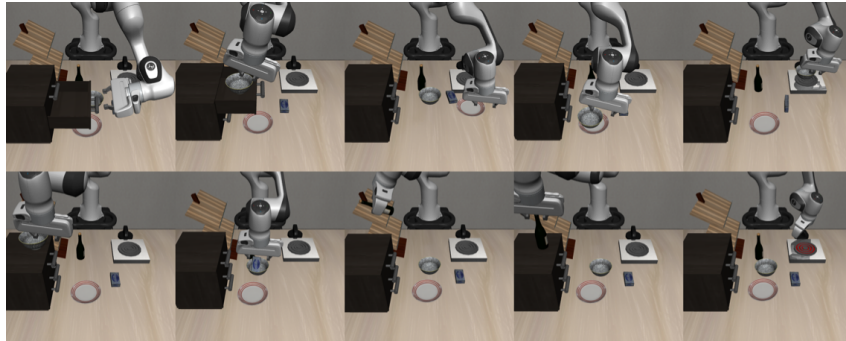

Figure 9: LIBERO-GOAL

615  
616  
617  
618  
619  
620

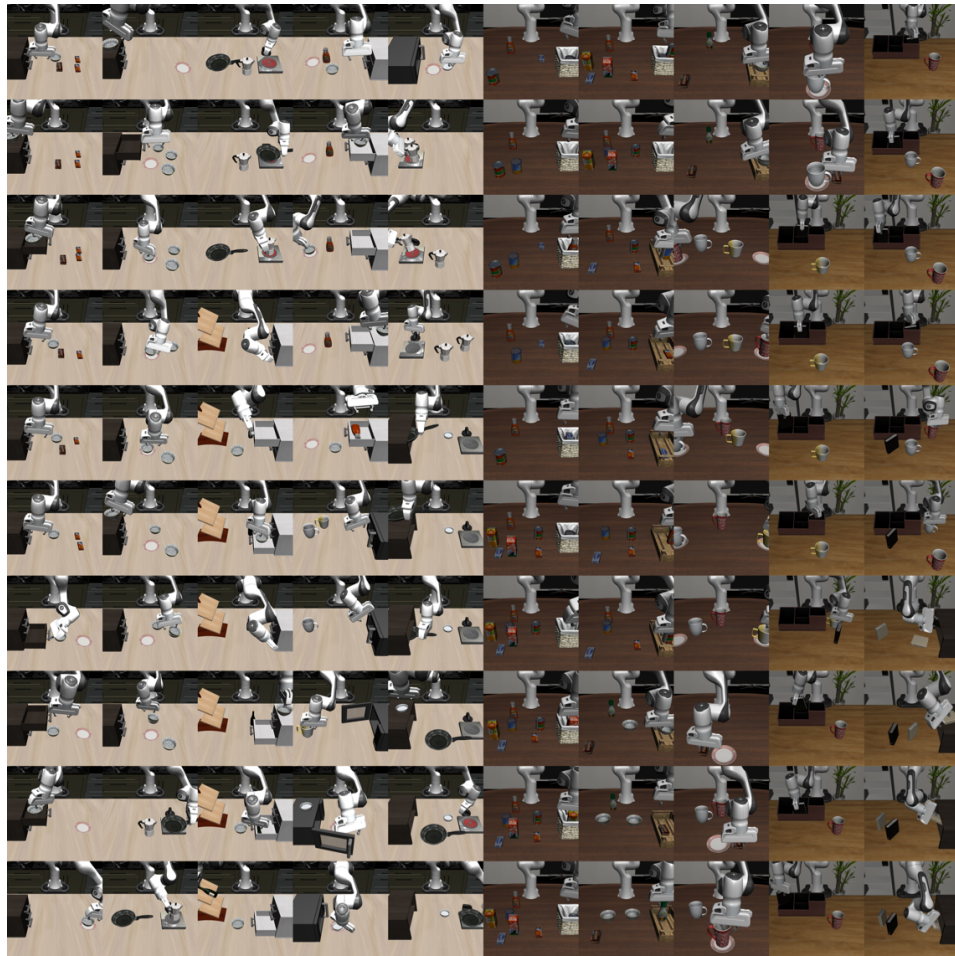

Figure 10: LIBERO-100

621

622

## 623 D.2 PDDL-based Scene Description File

624 Here we visualize the whole content of an example scene description file based on PDDL. This file  
625 corresponds to the task shown in Figure 2

626 **Example task:** *Open the top drawer of the cabinet and put the bowl in it.*

```
627 (define (problem LIBERO_Kitchen_Tabletop_Manipulation)
628   (:domain robosuite)
629   (:language open the top drawer of the cabinet and put the bowl in it)
630   (:regions
631     (wooden_cabinet_init_region
632       (:target kitchen_table)
633       (:ranges (
634         (-0.01 -0.31 0.01 -0.29)
635       ))
636     )
637     (:yaw_rotation (
638       (3.141592653589793 3.141592653589793)
639     ))
640   )
641   )
642   (akita_black_bowl_init_region
643     (:target kitchen_table)
644     (:ranges (
645       (-0.025 -0.025 0.025 0.025)
646     ))
647   )
648   (:yaw_rotation (
649     (0.0 0.0)
650   ))
651 )
652 )
653 (plate_init_region
654   (:target kitchen_table)
655   (:ranges (
656     (-0.025 0.225 0.025 0.275)
657   ))
658 )
659 (:yaw_rotation (
660   (0.0 0.0)
661 ))
662 )
663 )
664 (top_side
665   (:target wooden_cabinet_1)
666 )
667 (top_region
668   (:target wooden_cabinet_1)
669 )
670 (middle_region
671   (:target wooden_cabinet_1)
672 )
673 (bottom_region
674   (:target wooden_cabinet_1)
675 )
676 )
677 (:fixtures
678
```

```

679     kitchen_table - kitchen_table
680     wooden_cabinet_1 - wooden_cabinet
681 )
682
683 (: objects
684     akita_black_bowl_1 - akita_black_bowl
685     plate_1 - plate
686 )
687
688 (: obj_of_interest
689     wooden_cabinet_1
690     akita_black_bowl_1
691 )
692
693 (: init
694     (On akita_black_bowl_1 kitchen_table_akita_black_bowl_init_region)
695     (On plate_1 kitchen_table_plate_init_region)
696     (On wooden_cabinet_1 kitchen_table_wooden_cabinet_init_region)
697 )
698
699 (: goal
700     (And (Open wooden_cabinet_1_top_region)
701           (In akita_black_bowl_1 wooden_cabinet_1_top_region)
702     )
703 )
704
705 )

```

## E Experimental Setup

We consider five lifelong learning algorithms: SEQL the sequential learning baseline where the agent learns each task in the sequence directly without any further consideration, MTL the multitask learning baseline where the agent learns all tasks in the sequence simultaneously, the regularization-based method EWC [33], the replay-based method ER [13], and the dynamic architecture-based method PACKNET [40]. SEQL and MTL can be seen as approximations of the lower and upper bounds respectively for any lifelong learning algorithm. The other three methods represent the three primary categories of lifelong learning algorithms. For the neural architectures, we consider three vision-language policy architectures: RESNET-RNN, RESNET-T, ViT-T, which differ in how spatial or temporal information is aggregated (See Appendix B.1 for more details). For each task, the agent is trained over 50 epochs on the 50 demonstration trajectories. We evaluate the agent’s average success rate over 20 test rollout trajectories of a maximum length of 600 every 5 epochs. We use Adam optimizer [32] with a batch size of 32, and a cosine scheduled learning rate from 0.0001 to 0.00001 for each task. Following the convention of Robomimic [41], we pick the model checkpoint that achieves the best success rate as the final policy for a given task. After 50 epochs of training, the agent with the best checkpoint is then evaluated on all previously learned tasks, with 20 test rollout trajectories for each task. All policy networks are matched in Floating Point Operations Per Second (FLOPS): all policy architectures have  $\sim 13.5\text{G}$  FLOPS. For each combination of algorithm, policy architecture, and task suite, we run the lifelong learning method 3 times with random seeds  $\{100, 200, 300\}$  (180 experiments in total). See Table 4 for the implemented algorithms and architectures.

## F Additional Experiment Results

### F.1 Full Results

We provide the full results across three different lifelong learning algorithms (e.g., EWC, ER, PACKNET) and three different policy architectures (e.g., RESNET-RNN, RESNET-T, ViT-T) on the four task suites in Table 8.

To better illustrate the performance of each lifelong learning agent throughout the learning process, we present plots that show how the agent’s performance evolves over the stream of tasks. Firstly, we provide plots that compare the performance of the agent using different lifelong learning algorithms while fixing the policy architecture (refer to Figure 11, 12, and 13). Next, we provide plots that compare the performance of the agent using different policy architectures while fixing the lifelong learning algorithm (refer to Figure 14, 15, and 16).



| Algo.         | Policy Arch. | FWT( $\uparrow$ ) | NBT( $\downarrow$ ) | AUC( $\uparrow$ ) | FWT( $\uparrow$ ) | NBT( $\downarrow$ ) | AUC( $\uparrow$ ) |
|---------------|--------------|-------------------|---------------------|-------------------|-------------------|---------------------|-------------------|
| LIBERO-LONG   |              |                   |                     | LIBERO-SPATIAL    |                   |                     |                   |
| SEQL          | RESNET-RNN   | $0.24 \pm 0.02$   | $0.28 \pm 0.01$     | $0.07 \pm 0.01$   | $0.50 \pm 0.01$   | $0.61 \pm 0.01$     | $0.14 \pm 0.01$   |
|               | RESNET-T     | $0.54 \pm 0.01$   | $0.63 \pm 0.01$     | $0.15 \pm 0.00$   | $0.72 \pm 0.01$   | $0.81 \pm 0.01$     | $0.20 \pm 0.01$   |
|               | ViT-T        | $0.44 \pm 0.04$   | $0.50 \pm 0.05$     | $0.13 \pm 0.01$   | $0.63 \pm 0.02$   | $0.76 \pm 0.01$     | $0.16 \pm 0.01$   |
| ER            | RESNET-RNN   | $0.16 \pm 0.02$   | $0.16 \pm 0.02$     | $0.08 \pm 0.01$   | $0.40 \pm 0.02$   | $0.29 \pm 0.02$     | $0.29 \pm 0.01$   |
|               | RESNET-T     | $0.48 \pm 0.02$   | $0.32 \pm 0.04$     | $0.32 \pm 0.01$   | $0.65 \pm 0.03$   | $0.27 \pm 0.03$     | $0.56 \pm 0.01$   |
|               | ViT-T        | $0.38 \pm 0.05$   | $0.29 \pm 0.06$     | $0.25 \pm 0.02$   | $0.63 \pm 0.01$   | $0.29 \pm 0.02$     | $0.50 \pm 0.02$   |
| EWC           | RESNET-RNN   | $0.02 \pm 0.00$   | $0.04 \pm 0.01$     | $0.00 \pm 0.00$   | $0.14 \pm 0.02$   | $0.23 \pm 0.02$     | $0.03 \pm 0.00$   |
|               | RESNET-T     | $0.13 \pm 0.02$   | $0.22 \pm 0.03$     | $0.02 \pm 0.00$   | $0.23 \pm 0.01$   | $0.33 \pm 0.01$     | $0.06 \pm 0.01$   |
|               | ViT-T        | $0.05 \pm 0.02$   | $0.09 \pm 0.03$     | $0.01 \pm 0.00$   | $0.32 \pm 0.03$   | $0.48 \pm 0.03$     | $0.06 \pm 0.01$   |
| PACKNET       | RESNET-RNN   | $0.13 \pm 0.00$   | $0.21 \pm 0.01$     | $0.03 \pm 0.00$   | $0.27 \pm 0.03$   | $0.38 \pm 0.03$     | $0.06 \pm 0.01$   |
|               | RESNET-T     | $0.22 \pm 0.01$   | $0.08 \pm 0.01$     | $0.25 \pm 0.00$   | $0.55 \pm 0.01$   | $0.07 \pm 0.02$     | $0.63 \pm 0.00$   |
|               | ViT-T        | $0.36 \pm 0.01$   | $0.14 \pm 0.01$     | $0.34 \pm 0.01$   | $0.57 \pm 0.04$   | $0.15 \pm 0.00$     | $0.59 \pm 0.03$   |
| MTL           | RESNET-RNN   |                   |                     | $0.20 \pm 0.01$   |                   |                     | $0.61 \pm 0.00$   |
|               | RESNET-T     |                   |                     | $0.48 \pm 0.01$   |                   |                     | $0.83 \pm 0.00$   |
|               | ViT-T        |                   |                     | $0.46 \pm 0.00$   |                   |                     | $0.79 \pm 0.01$   |
| LIBERO-OBJECT |              |                   |                     | LIBERO-GOAL       |                   |                     |                   |
| SEQL          | RESNET-RNN   | $0.48 \pm 0.03$   | $0.53 \pm 0.04$     | $0.15 \pm 0.01$   | $0.61 \pm 0.01$   | $0.73 \pm 0.01$     | $0.16 \pm 0.00$   |
|               | RESNET-T     | $0.78 \pm 0.04$   | $0.76 \pm 0.04$     | $0.26 \pm 0.02$   | $0.77 \pm 0.01$   | $0.82 \pm 0.01$     | $0.22 \pm 0.00$   |
|               | ViT-T        | $0.76 \pm 0.03$   | $0.73 \pm 0.03$     | $0.27 \pm 0.02$   | $0.75 \pm 0.01$   | $0.85 \pm 0.01$     | $0.20 \pm 0.01$   |
| ER            | RESNET-RNN   | $0.30 \pm 0.01$   | $0.27 \pm 0.05$     | $0.17 \pm 0.05$   | $0.41 \pm 0.00$   | $0.35 \pm 0.01$     | $0.26 \pm 0.01$   |
|               | RESNET-T     | $0.67 \pm 0.07$   | $0.43 \pm 0.04$     | $0.44 \pm 0.06$   | $0.64 \pm 0.01$   | $0.34 \pm 0.02$     | $0.49 \pm 0.02$   |
|               | ViT-T        | $0.70 \pm 0.02$   | $0.28 \pm 0.01$     | $0.57 \pm 0.01$   | $0.57 \pm 0.00$   | $0.40 \pm 0.02$     | $0.38 \pm 0.01$   |
| EWC           | RESNET-RNN   | $0.17 \pm 0.04$   | $0.23 \pm 0.04$     | $0.06 \pm 0.01$   | $0.16 \pm 0.01$   | $0.22 \pm 0.01$     | $0.06 \pm 0.01$   |
|               | RESNET-T     | $0.56 \pm 0.03$   | $0.69 \pm 0.02$     | $0.16 \pm 0.02$   | $0.32 \pm 0.02$   | $0.48 \pm 0.03$     | $0.06 \pm 0.00$   |
|               | ViT-T        | $0.57 \pm 0.03$   | $0.64 \pm 0.03$     | $0.23 \pm 0.00$   | $0.32 \pm 0.04$   | $0.45 \pm 0.04$     | $0.07 \pm 0.01$   |
| PACKNET       | RESNET-RNN   | $0.29 \pm 0.02$   | $0.35 \pm 0.02$     | $0.13 \pm 0.01$   | $0.32 \pm 0.03$   | $0.37 \pm 0.04$     | $0.11 \pm 0.01$   |
|               | RESNET-T     | $0.60 \pm 0.07$   | $0.17 \pm 0.05$     | $0.60 \pm 0.05$   | $0.63 \pm 0.02$   | $0.06 \pm 0.01$     | $0.75 \pm 0.01$   |
|               | ViT-T        | $0.58 \pm 0.03$   | $0.18 \pm 0.02$     | $0.56 \pm 0.04$   | $0.69 \pm 0.02$   | $0.08 \pm 0.01$     | $0.76 \pm 0.02$   |
| MTL           | RESNET-RNN   |                   |                     | $0.10 \pm 0.03$   |                   |                     | $0.59 \pm 0.00$   |
|               | RESNET-T     |                   |                     | $0.54 \pm 0.02$   |                   |                     | $0.80 \pm 0.01$   |
|               | ViT-T        |                   |                     | $0.78 \pm 0.02$   |                   |                     | $0.82 \pm 0.01$   |

Table 8: We present the full results of all networks and algorithms on all four task suites. For each task suite, we highlight the top three AUC scores among the combinations of the three lifelong learning algorithms and the three neural architectures. The best three results are highlighted in **magenta** (the best), **light magenta** (the second best), and **super light magenta** (the third best), respectively.



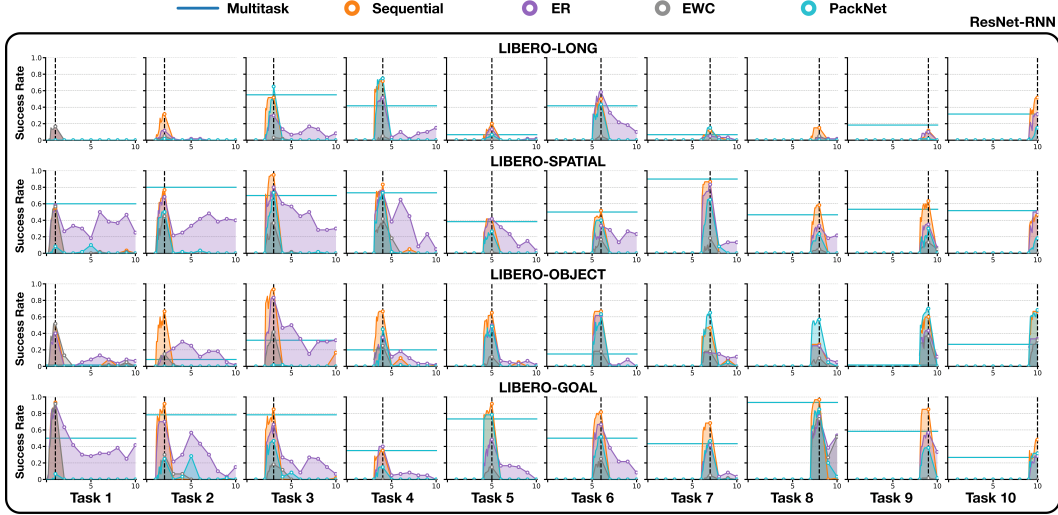

Figure 11: We compare the performance of different algorithms using the RESNET-RNN policy architecture in Figure 1. The  $y$ -axis represents the success rate, and the  $x$ -axis shows the agent’s performance on each of the 10 tasks in a specific task suite over the course of learning. For example, the upper-left plot in the figure displays the agent’s performance on the first task as it learns the 10 tasks sequentially.

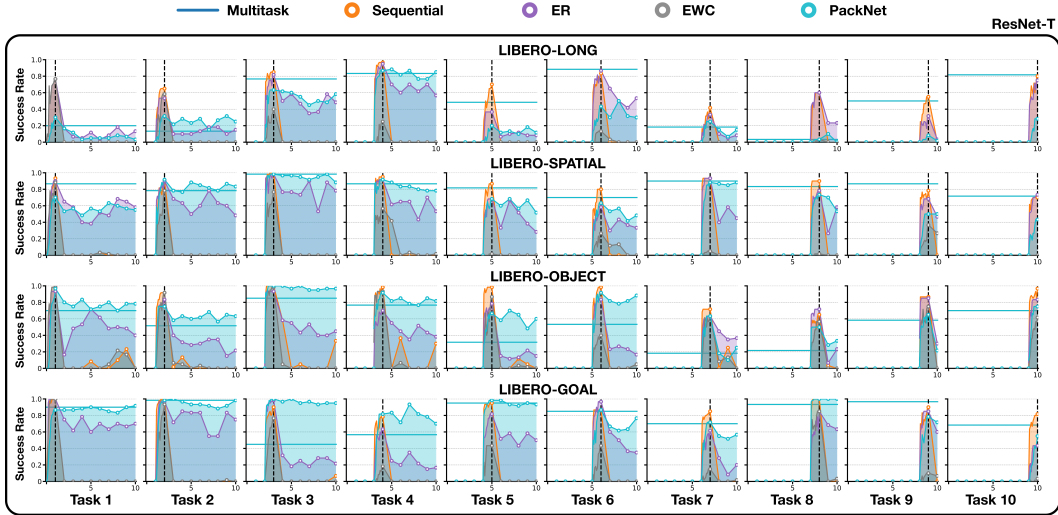

Figure 12: Comparison of different algorithms using the RESNET-T policy architecture. The  $y$ -axis represents the success rate, while the  $x$ -axis shows the agent’s performance on each of the 10 tasks in a given task suite during the course of learning. For example, the plot in the upper-left corner depicts the agent’s performance on the first task as it learns the 10 tasks sequentially.

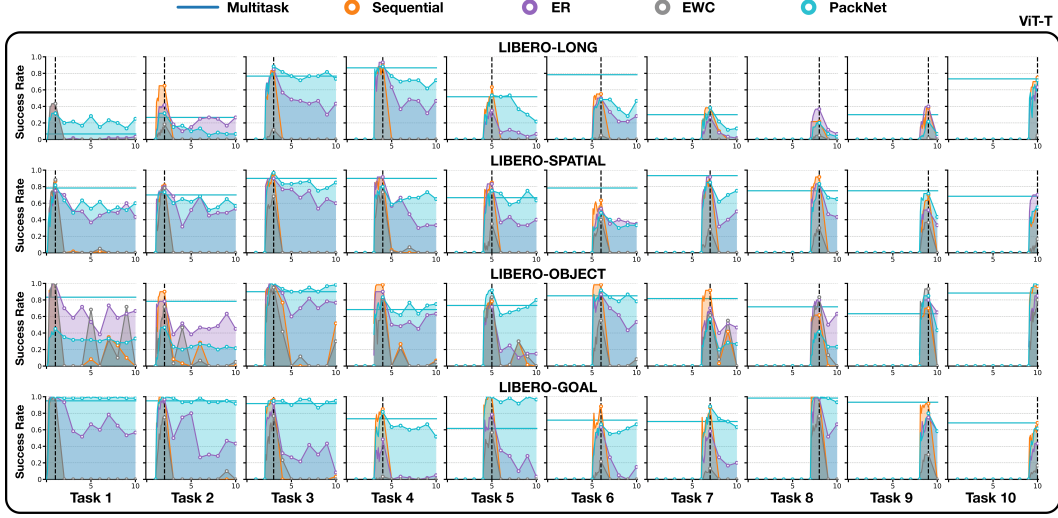

Figure 13: Comparison of different algorithms using the ViT-T policy architecture. The success rate is represented on the  $y$ -axis, while the  $x$ -axis shows the agent’s performance on the 10 tasks in a given task suite over the course of learning. For instance, the plot in the upper-left corner illustrates the agent’s performance on the first task when learning the 10 tasks sequentially.

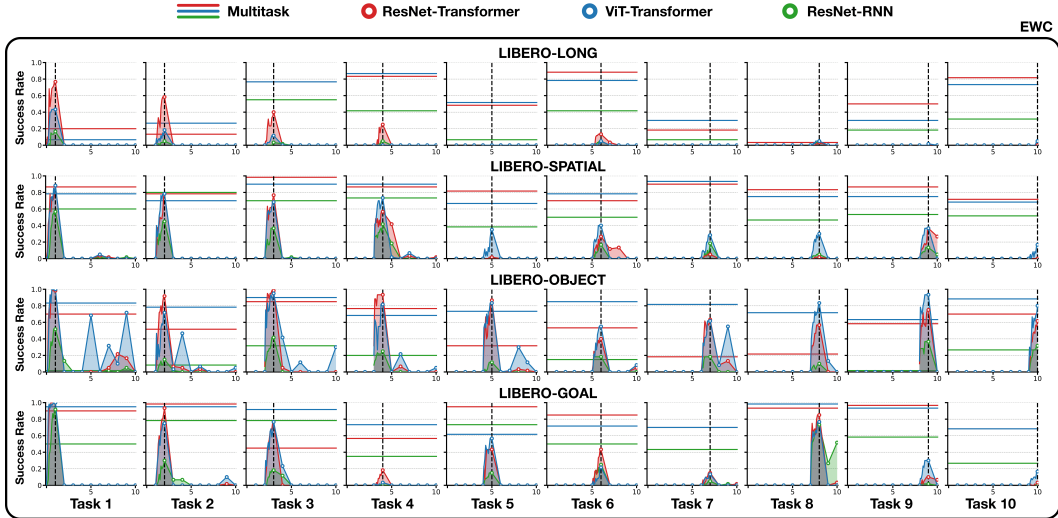

Figure 14: Comparison of different architectures with the EWC algorithm. The  $y$ -axis is the success rate, while the  $x$ -axis shows the agent’s performance on the 10 tasks in a given task suite over the course of learning. For instance, the upper-left plot shows the agent’s performance on the first task when learning the 10 tasks sequentially.

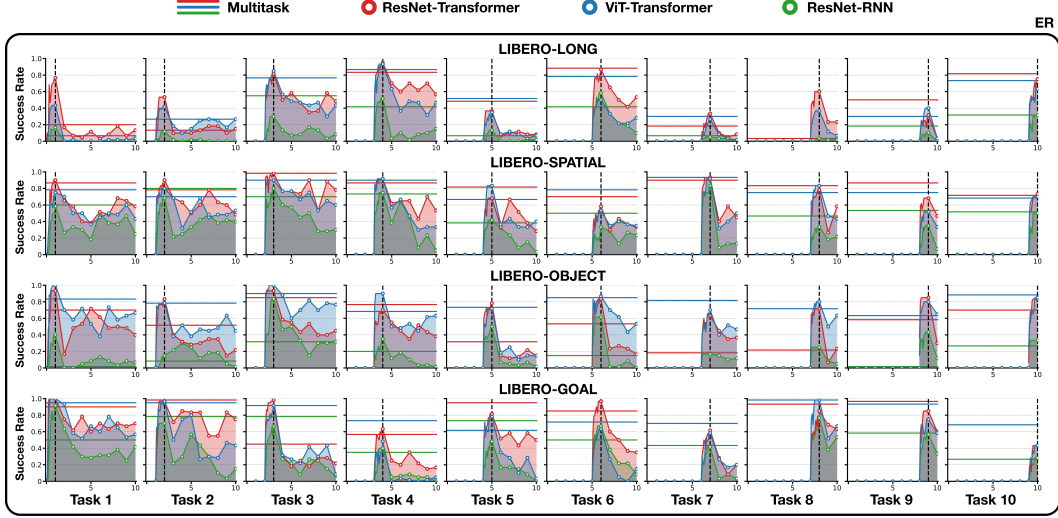

Figure 15: Comparison of different architectures with the ER algorithm. The  $y$ -axis is the success rate, while the  $x$ -axis shows the agent’s performance on the 10 tasks in a given task suite ver the course of learning. For instance, the upper-left plot shows the agent’s performance on the first task when learning the 10 tasks sequentially.

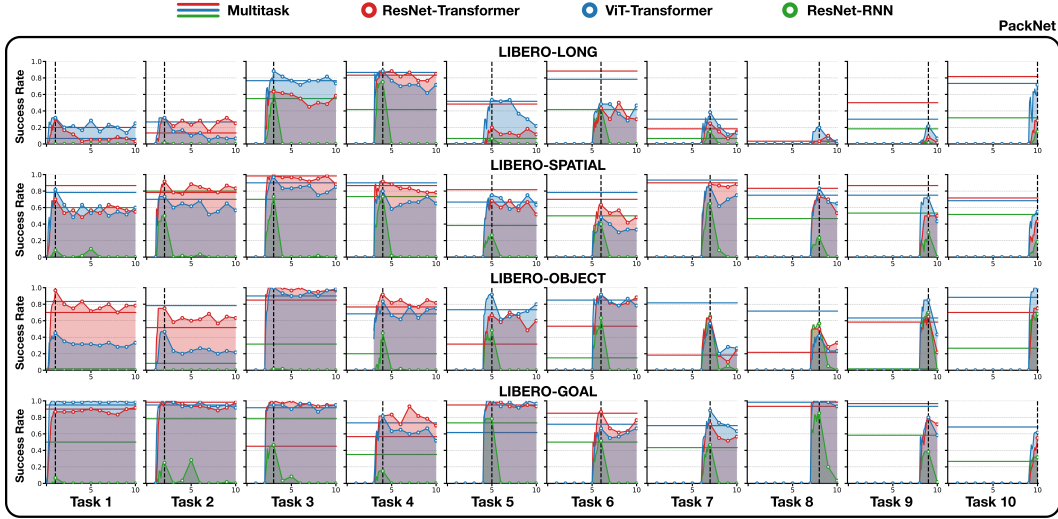

Figure 16: Comparison of different architectures with the PACKNET algorithm. The  $y$ -axis is the success rate, while the  $x$ -axis shows the agent’s performance on the 10 tasks in a given task suite over the course of learning. For instance, the upper-left plot shows the agent’s performance on the first task when learning the 10 tasks sequentially.

## F.2 Study on task ordering (Q4)

Figure 17 shows the result of the study on Q4. For all experiments in this study, we used RESNET-T as the neural architecture and evaluated both ER and PACKNET. As the figure illustrates, the performance of both algorithms varies across different task orderings. This finding highlights an important direction for future research: developing algorithms or architectures that are robust to varying task orderings.

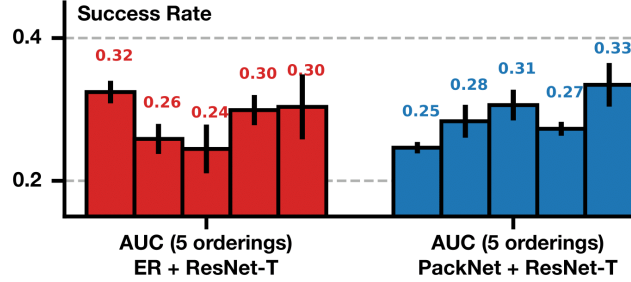

Figure 17: Performance of ER and PACKNET using RESNET-T on five different task orderings. An error bar shows the performance standard deviation for a fixed ordering.

**Findings:** From Figure 17 we observe that indeed different task ordering could result in very different performances for the same algorithm. Specifically, such difference is statistically significant for PACKNET.

## F.3 Loss v.s. Success Rates

We demonstrate that behavioral cloning loss can be a misleading indicator of task success rate in this section. In supervised learning tasks like image classifications, lower loss often indicates better prediction accuracy. However, this is not, in general, true for decision-making tasks. This is because errors can compound until failures during executing a robot [54]. Figure 18, 12 and 13 plots the training loss and success rates of three lifelong learning methods (ER, EWC, and PACKNET) for comparison. We evaluate the three algorithms on four task suites using three different neural architectures.

**Findings:** We observe that though sometimes EWC has the **lowest** loss, it did not achieve good success rate. ER, on the other hand, can have the highest loss but perform better than EWC. In conclusion, success rates, instead of behavioral cloning loss, should be the right metric to evaluate whether a model checkpoint is good or not.

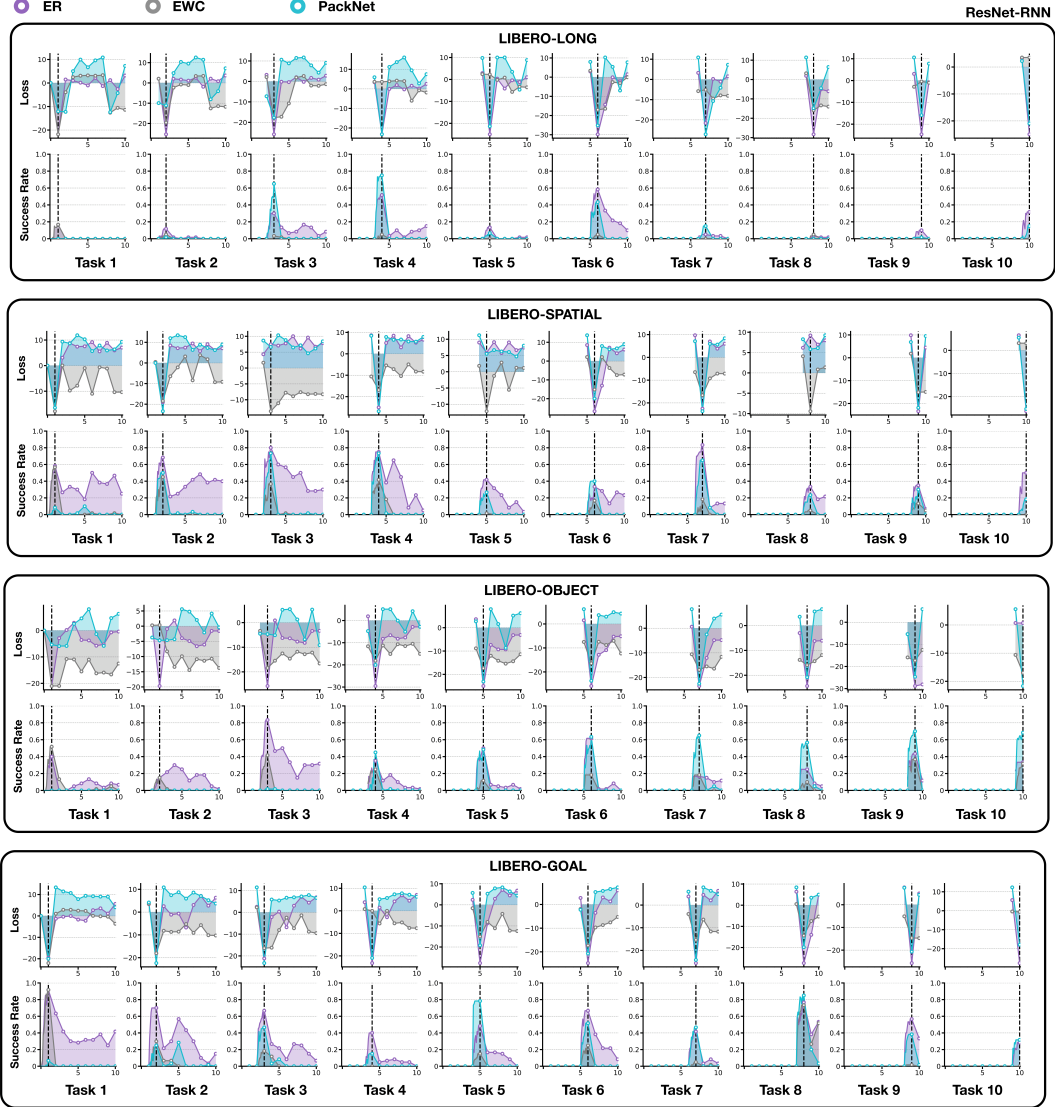

Figure 18: Losses and success rates of ER (violet), EWC (grey), and PACKNET (blue) on four task suites with RESNET-RNN policy. The first (second) row shows the loss (success rate) of the agent on task  $i$  throughout the LLDM procedure.

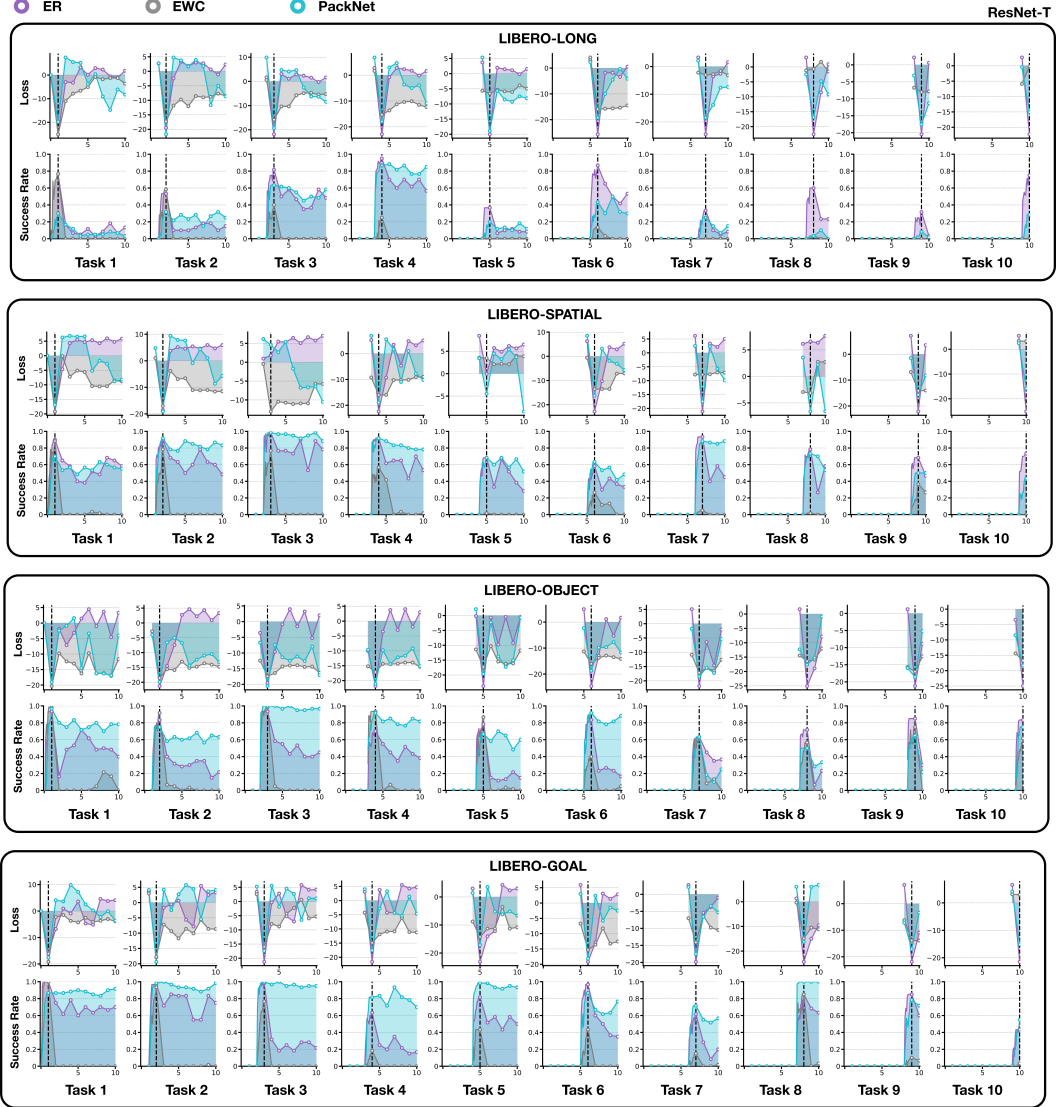

Figure 19: Losses and success rates of ER (violet), EWC (grey), and PACKNET (blue) on four task suites with RESNET-T policy. The first (second) row shows the loss (success rate) of the agent on task  $i$  throughout the LLDM procedure.

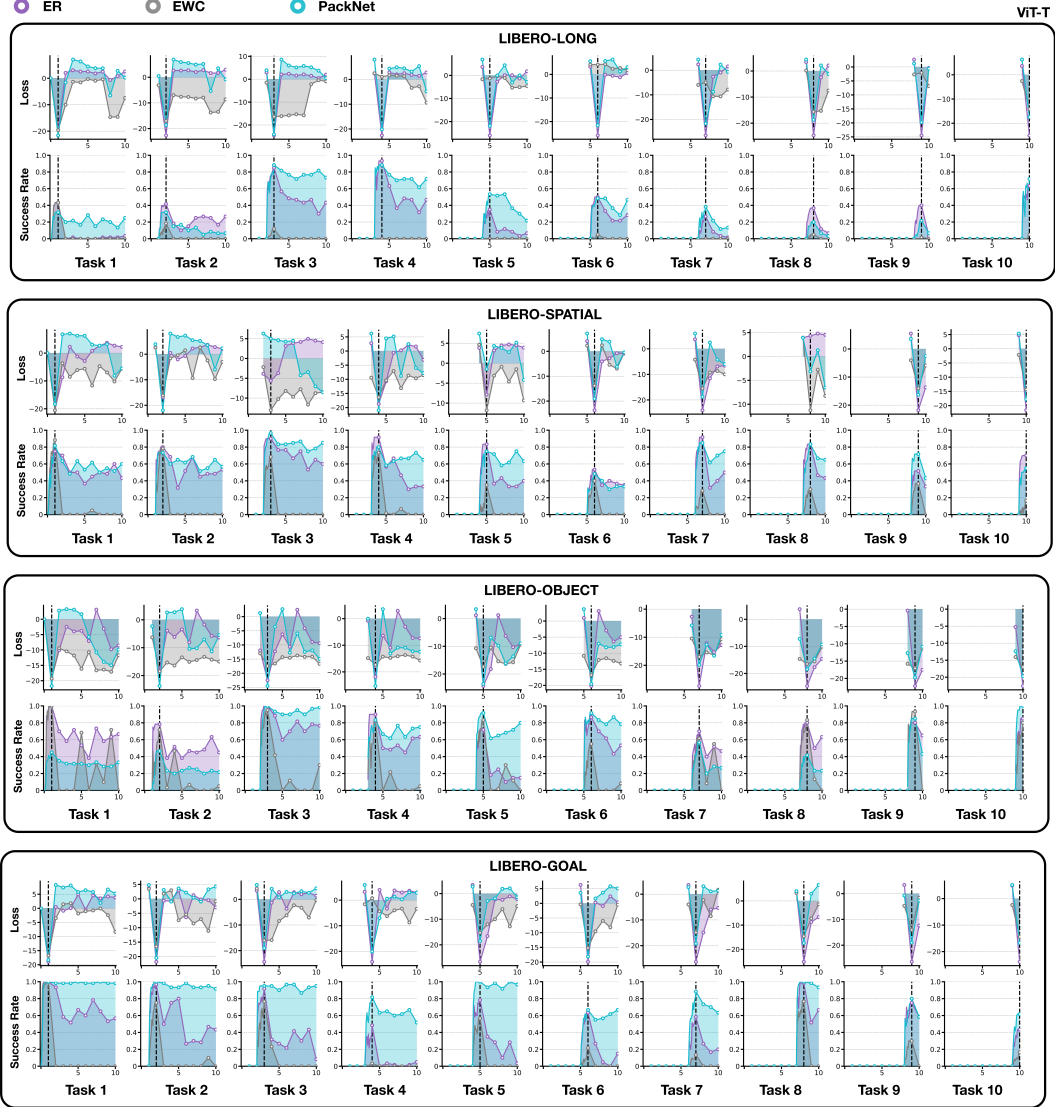

Figure 20: Losses and success rates of ER (violet), EWC (grey), and PACKNET (blue) on four task suites with ViT-T policy. The first (second) row shows the loss (success rate) of the agent on task  $i$  throughout the LLDM procedure.



#### 759 F.4 Attention Visualization

760 It is also important to visualize the behavior of the robot and its attention maps during the completion  
 761 of tasks in the lifelong learning process to give us intuition and qualitative feedback on the perfor-  
 762 mance of different algorithms and architectures. We visualize the attention maps of learned policies  
 763 with (author?) [23] and compare them in different studies as in 5.2 to see if the robot correctly pays  
 764 attention to the right regions of interest in each task.

765 **Perturbation-based attention visualization:** We use a perturbation-based method [23] to extract  
 766 attention maps from agents. Given an input image  $I$ , the method applies a Gaussian filter to a pixel  
 767 location  $(i, j)$  to blur the image partially, and produces the perturbed image  $\Phi(I, i, j)$ . Denote the  
 768 learned policy as  $\pi$  and the inputs to the spatial module (e.g., the last latent representation of resnet  
 769 or ViT encoder)  $\pi_u(I)$  for image  $I$ . Then we define the saliency score as the Euclidean distance  
 770 between the latent representations of the original and the blurred images:

$$S_\pi(i, j) = \frac{1}{2} \left\| \pi_u(I) - \pi_u(\Phi(I, i, j)) \right\|^2. \quad (3)$$

771 Intuitively,  $S_\pi(i, j)$  describes *how much removing information from the region around location  $(i, j)$*   
 772 *changes the policy*. In other words, a large  $S_\pi(i, j)$  indicates that the information around pixel  $(i, j)$   
 773 is important for the learning agent’s decision-making. Instead of calculating the score for every  
 774 pixel, [23] found that computing a saliency score for pixel  $i \bmod 5$  and  $j \bmod 5$  produced good  
 775 saliency maps at lower computational costs for Atari games. The final saliency map  $P$  is normalized  
 776 as  $P(i, j) = \frac{S_\pi(i, j)}{\sum_{i, j} S_\pi(i, j)}$ .

777 We provide the visualization and our analysis on the following pages.



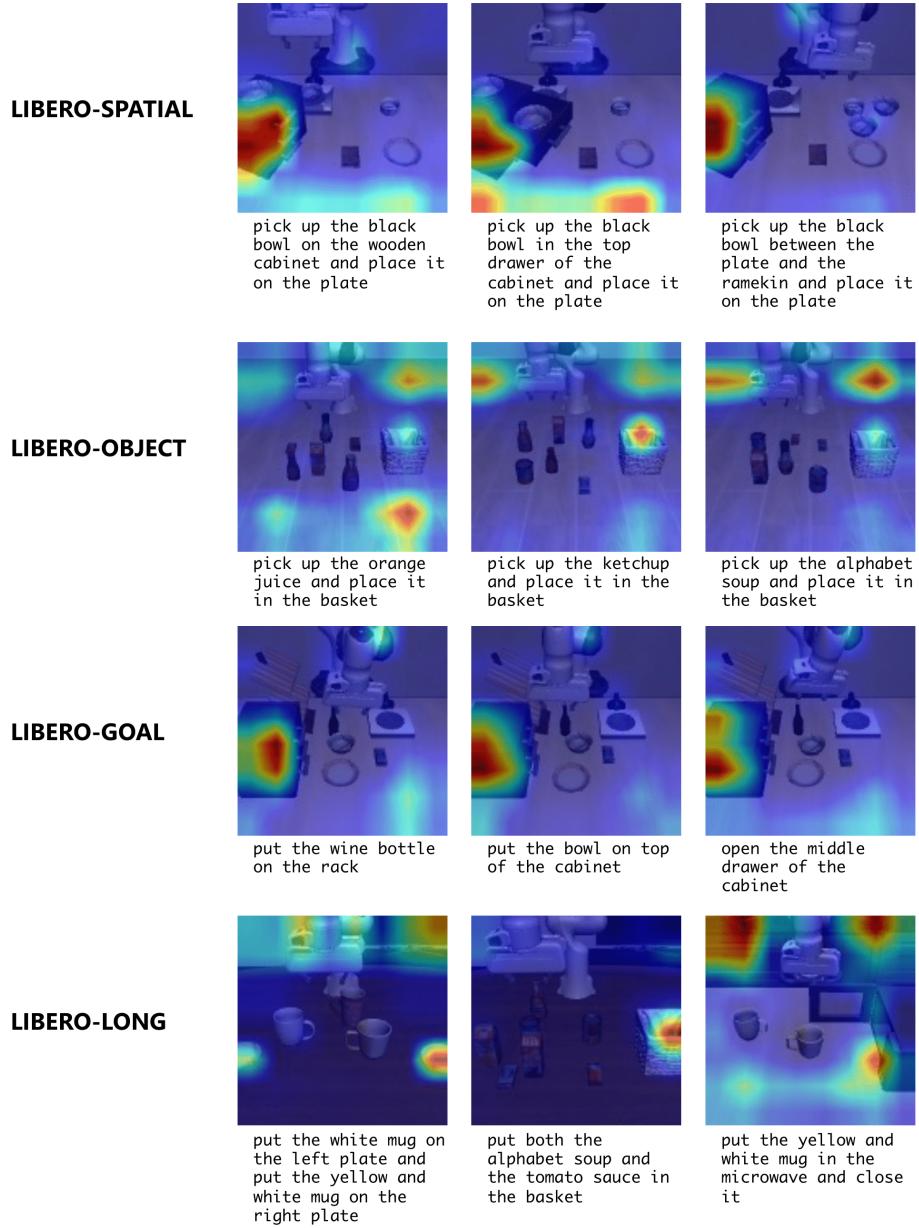

Figure 21: Attention map comparison among different task suites with ER and RESNET-T. Each row corresponds to a task suite.

780 **Findings:** Figure 21 shows attention visualization for 12 tasks across 4 task suites (e.g., 3 tasks per  
781 suite). We observe that:

- 782 1. policies pay more attention to the robot arm and the target placement area than the target  
783 object.
- 784 2. sometimes the policy pays attention to task-irrelevant areas, such as the blank area on the  
785 table.

786 These observations demonstrate that the learned policy use perceptual data for decision-making  
787 in a very different way from how humans do. The robot policies tends to spuriously correlate  
788 task-irrelevant features with actions, a major reason why the policies overfit to the tasks and do not  
789 generalize well across tasks.

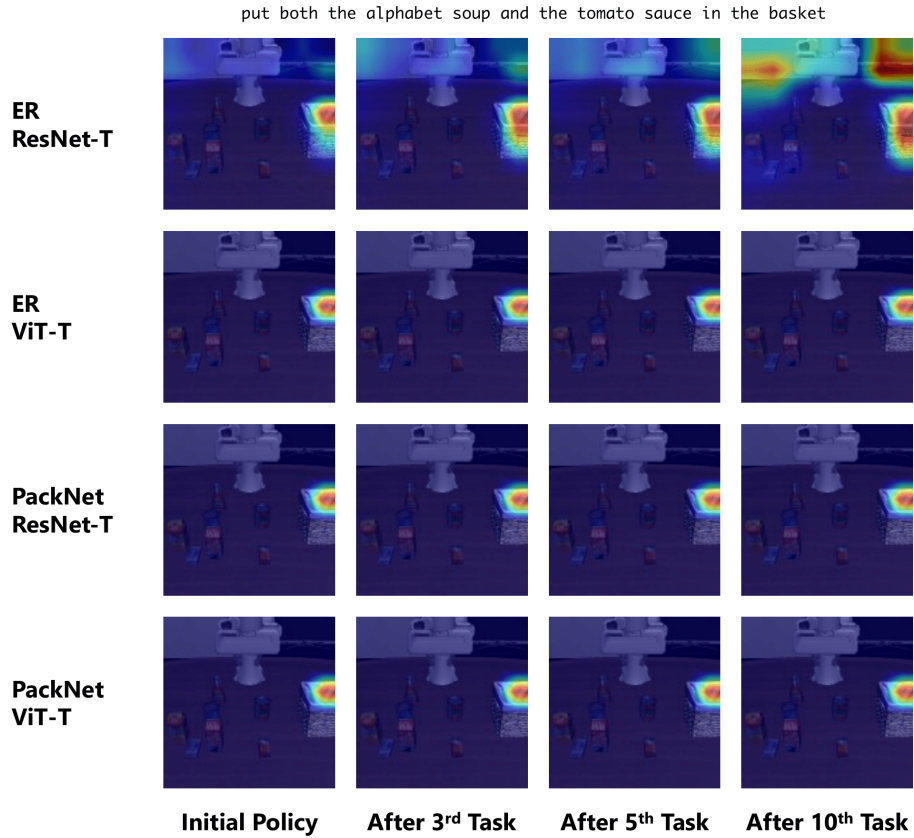

Figure 22: Attention map of the same state of the task *put both the alphabet soup and the tomato sauce in the basket* from LIBERO-LONG during lifelong learning. Each row visualizes how the attention maps change on the first task with one of the LL algorithms (ER and PACKNET) and one of the neural architectures (RESNET-T and ViT-T). Initial policy is the policy that is trained on the first task. And all the following attention maps correspond to policies after training on the third, fifth, and the tenth tasks.

792 **Findings:** Figure 22 shows attention visualizations from policies trained with ER and PACKNET  
793 using the architectures RESNET-T and ViT-T respectively. We observe that:

- 794 1. The ViT visual encoder’s attention is more consistent over time, while the ResNet encoder’s  
795 attention map gradually dilutes.
- 796 2. PackNet, as it splits the model capacity for different tasks, shows a more consistent attention  
797 map over the course of learning.

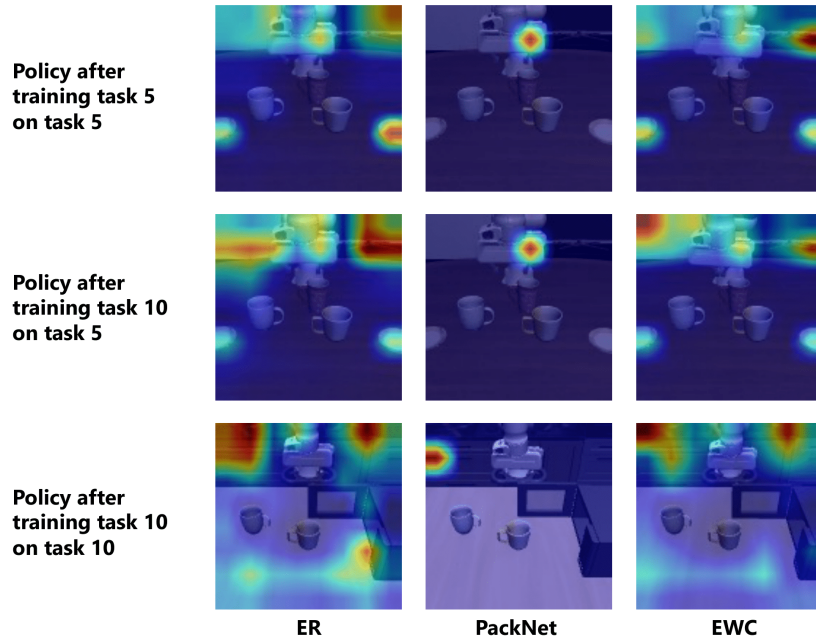

Figure 23: Comparison of attention maps of different lifelong learning algorithms with RESNET-T on LIBERO-LONG. Each row shows the same state of a task with different neural architectures. “Task 5” refers to the task *put the white mug on the left plate and put the yellow and white mug on the right plate*. “Task 10” refers to the task *put the yellow and white mug in the microwave and close it*. The second row shows the policy that is trained on task 10 and gets evaluated on task 5, showing the attention map differences in backward transfer.

800 **Findings:** Figure 23 shows the attention visualization of three lifelong learning algorithms on  
801 LIBERO-LONG with RESNET-T on two tasks (task 5 and task 10). The first and third rows show the  
802 attention of the policy on the same task it has just learned. While the second row shows the attention  
803 of the policy on the task it learned in the past. We observe that:

- 804 1. PACKNET shows more concentrated attention compared against ER and EWC (usually just  
805 a single mode).
- 806 2. ER shares similar attention map with EWC, but EWC performs much worse than ER.  
807 Therefore, attention can only assist the analysis but cannot be treated as a criterion for  
808 performance prediction.

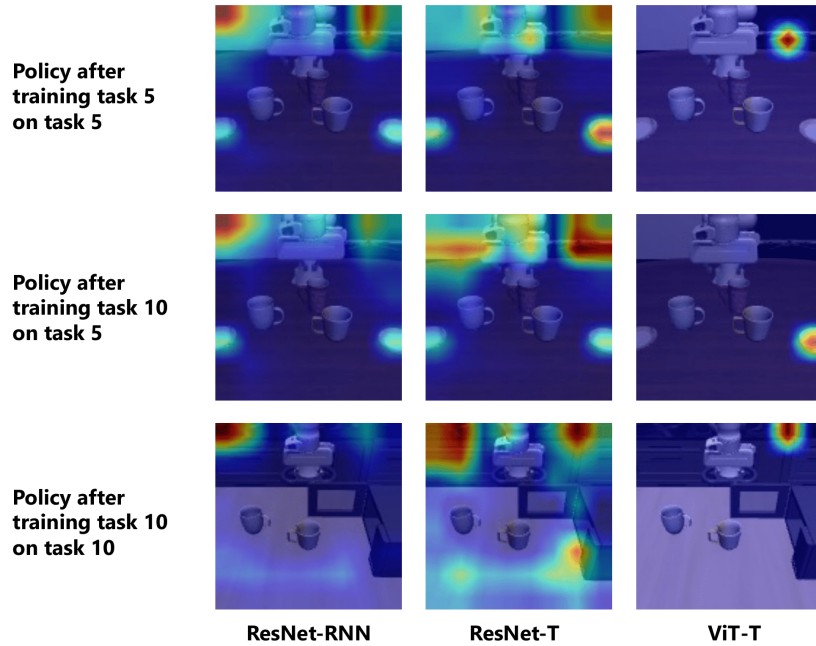

Figure 24: Comparison of attention maps of different neural architectures with ER on LIBERO-LONG. Each row shows the same state of a task with different neural architectures. “Task 5” refers to the task *put the white mug on the left plate and put the yellow and white mug on the right plate*. “Task 10” refers to the task *put the yellow and white mug in the microwave and close it*. The second row shows the policy that is trained on task 10 and gets evaluated on task 5, showing the attention map differences in backward transfer.

811 **Findings:** Figure 24 shows attention map comparisons of the three neural architectures on LIBERO-  
812 LONG with ER on two tasks (task 5 and task 10). We observe that:

- 813 1. ViT has more concentrated attention than policies using ResNet.
- 814 2. When ResNet forgets, the attention is changing smoothly (more diluted). But for ViT, when  
815 it forgets, the attention can completely shift to a different location.
- 816 3. When ResNet is combined with LSTM or a temporal transformer, the attention hints at the  
817 "course of future trajectory". But we do not observe that when ViT is used as the encoder.

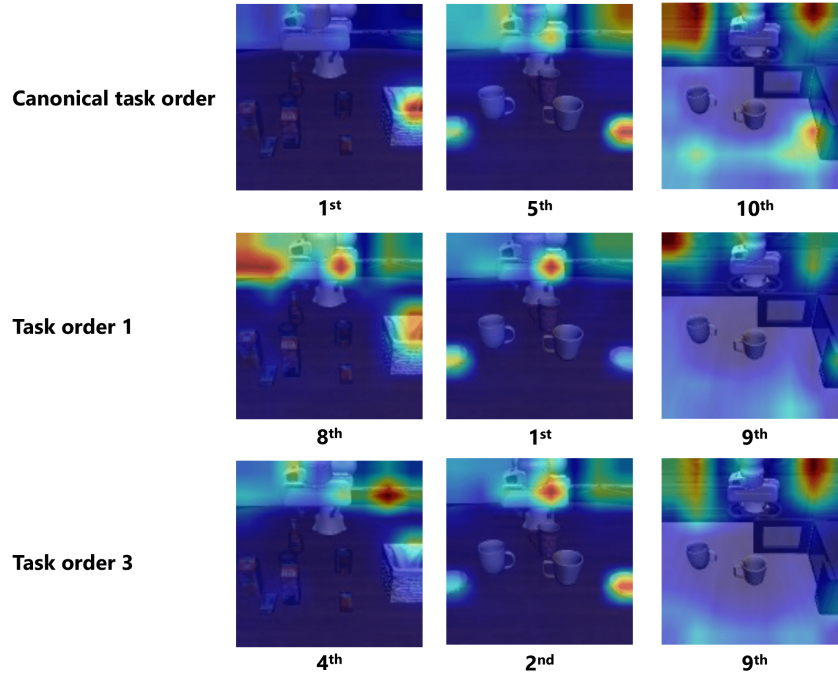

Figure 25: Attention map comparison among different orderings with ER and RESNET-T on three selected tasks from LIBERO-LONG: *put both the alphabet soup and the tomato sauce in the basket*, *put the white mug on the left plate and put the yellow and white mug on the right plate*, and *put the yellow and white mug in the microwave and close it*. Each row corresponds to a specific sequence of task ordering, and the caption of each attention map indicates the order of the task in that sequence.

820 **Findings:** Figure 25 shows attention map comparisons of three different task orderings. We show two  
821 immediately learned tasks from LIBERO-LONG trained with ER and RESNET-T. We observe that:

- 822 1. As expected, learning the same task at different positions in the task stream results in  
823 different attention visualization.
- 824 2. There seems to be a trend that the policy has a more spread-out attention when it learns on  
825 tasks that are later in the sequence.



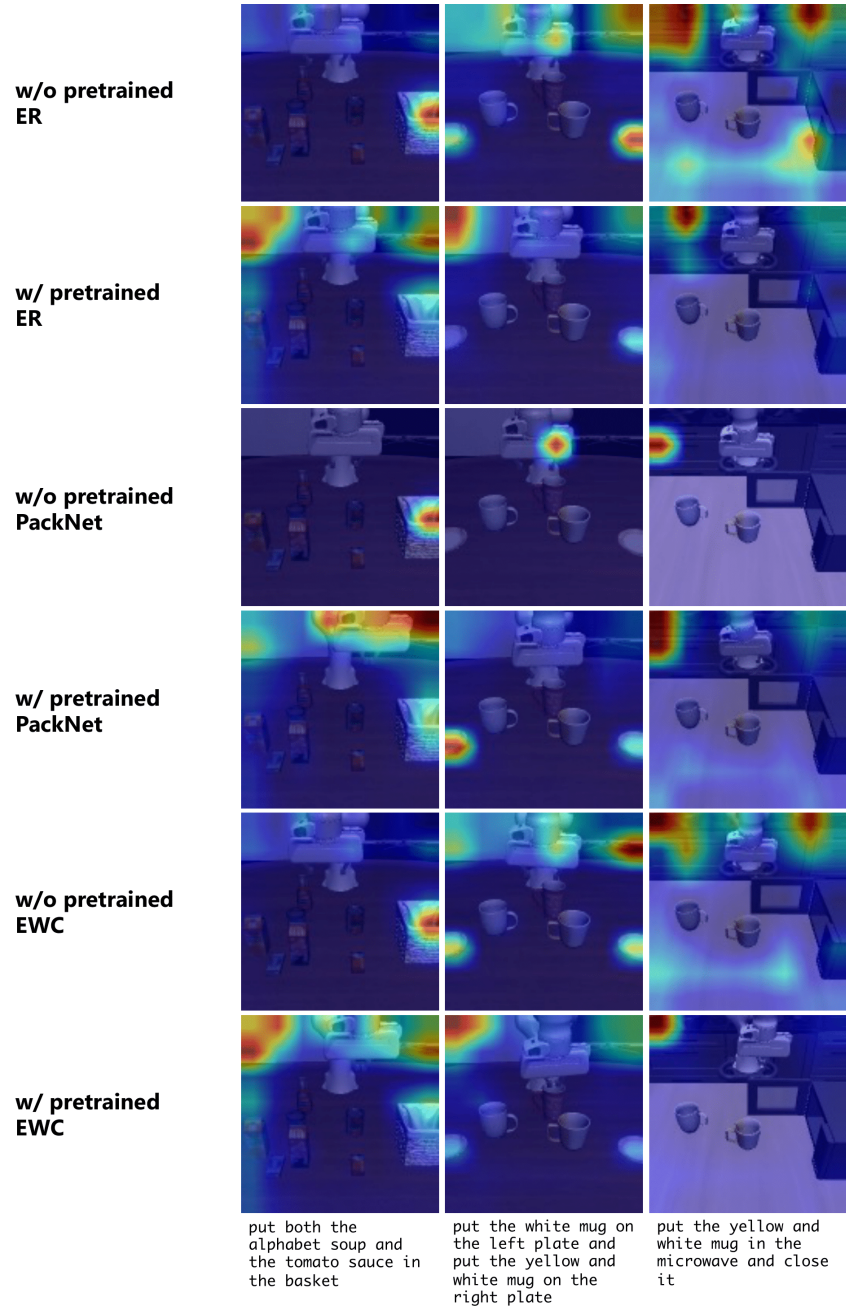

Figure 26: Attention map comparison between models without/with pretrained models using RESNET-T and different lifelong learning algorithms on three selected tasks from LIBERO-LONG.

828 *Findings:* Figure 26 shows attention map comparisons between models with/without pretrained  
829 models on LIBERO-LONG with RESNET-T and all three LL algorithms. We observe that:

- 830 1. With pretraining, the policies attend to task-irrelevant regions more easily than those without  
831 pretraining.
- 832 2. Some of the policies with pretraining have better attention to the task-relevant features than  
833 their counterparts without pretraining, but their performance remains lower (the last in the  
834 second row and the second in the fourth row). This observation, again, shows that there is  
835 no positive correlation between semantically meaningful attention maps and the policy's  
836 performance.
